# Supplementary material
Source: Elsevier journal article supplement (https://www.sciencedirect.com/science/article/pii/S0210569120303247)
Supplement: mmc2 [file S0210569120303247:mmc2.pdf]

## Supplemental Digital Content : Excluded articles and reasons

| Author     | Year | Journal                                                | Title                                                                                                                                                           | Reasons for exclusion      |
|------------|------|--------------------------------------------------------|-----------------------------------------------------------------------------------------------------------------------------------------------------------------|----------------------------|
| Abboud     | 2015 | Critical care medicine                                 | Efficacy of high flow/high humidity nasal cannula therapy in viral bronchiolitis                                                                                | Another kind of comparator |
|            | 2013 | Journal of Investigative Medicine                      | Use of high flow high humidity nasal cannula therapy for infants with bronchiolitis: Erratum                                                                    | Not RCT                    |
| Allen      | 2015 | Journal of Paediatrics & Child Health                  | HIGH FLOW NASAL CANNULA OXYGEN (HFNCO) THERAPY FOR BRONCHIOLITIS IN GENERAL PAEDIATRICS                                                                         | Not RCT                    |
| Anonymous  | 2017 | Acta Paediatrica, International Journal of Paediatrics | Corrigendum to: Using a high-flow nasal cannula provided superior results to low-flow oxygen delivery in moderate to severe bronchiolitis                       | Not RCT                    |
| Babl       | 2008 | Pediatric Emergency Care                               | Bronchiolitis management in pediatric emergency departments in Australia and New Zealand: a PREDICT study                                                       | No moderate or severe      |
| Bajaj      | 2006 | Pediatrics                                             | A randomized trial of home oxygen therapy from the emergency department for acute bronchiolitis                                                                 | Another kind of comparator |
| Balanzat   | 2006 | European respiratory journal                           | Effects of different levels of nasal continuous positive airways pressure (CPAP) in infants with severe acute bronchiolitis [Abstract]                          | Not availability           |
| Beasley    | 1981 | British Medical Journal Clinical Research Ed.          | Continuous positive airway pressure in bronchiolitis                                                                                                            | Not RCT                    |
| Beggs      | 2014 | Cochrane Database of Systematic Reviews                | High-flow nasal cannula therapy for infants with bronchiolitis                                                                                                  | Not RCT                    |
| Benckert   | 2015 | Critical Care Medicine                                 | Non-invasive ventilation usage and adverse events in an academic PICU                                                                                           | Not RCT                    |
| Blyth      | 2003 | Thorax                                                 | Randomised controlled trial of CPAP in severe bronchiolitis [abstract]                                                                                          | Not availability           |
| Bressan    | 2013 | European Journal of Pediatrics                         | High-flow nasal cannula oxygen for bronchiolitis in a pediatric ward: A pilot study                                                                             | Not RCT                    |
| Cahill     | 1983 | Irish Medical Journal                                  | Nasopharyngeal continuous positive airway pressure in the management of bronchiolitis                                                                           | Not RCT                    |
| Camboni e  | 2017 | Journal of Thoracic Disease                            | High flow nasal cannulae for acute viral bronchiolitis in young infants: Evidence-based medicine is underway to define target populations and optimal flows     | Not RCT                    |
| Campana    | 2014 | Archives of Disease in Childhood                       | High flow therapy versus hypertonic saline in bronchiolitis: Randomised controlled trial                                                                        | Another kind of comparator |
| Chidini    | 2015 | Pediatrics                                             | Continuous positive airway pressure with helmet versus mask in infants with bronchiolitis: An RCT                                                               | Another kind of comparator |
| Chidini    | 2011 | Intensive Care Medicine                                | Noninvasive continuous positive airway pressure (NCPAP) by helmet versus facial mask: A multicenter RCT                                                         | Another kind of comparator |
| Clayton    | 2019 | Pediatric Critical Care Medicine                       | Outcomes of Children With Bronchiolitis Treated With High-Flow Nasal Cannula or Noninvasive Positive Pressure Ventilation                                       | No RCT                     |
| Combret    | 2017 | Minerva Anestesiologica                                | Non-invasive ventilation improves respiratory distress in children with acute viral bronchiolitis: A systematic review                                          | Not RCT                    |
| Culverwell | 2014 | Pediatric Critical Care Medicine                       | Using nasal bubble continuous positive airway pressure in infants with bronchiolitis to keep them closer to their families                                      | Not RCT                    |
| Cunningham | 2015 | Health technology assessment (Winchester, England)     | Bronchiolitis of Infancy Discharge Study (BIDS): a multicentre, parallel-group, double-blind, randomised controlled, equivalence trial with economic evaluation | Not RCT                    |
| Dahlquist  | 2011 | Clinical Nurse Specialist                              | Steam inhalation or humidified oxygen for acute bronchiolitis in children up to 3 years of age                                                                  | Not RCT                    |
| Di Nardo   | 2012 | Acta Paediatrica, International Journal of Paediatrics | Air-oxygen helmet-delivered continuous positive airway pressure to manage respiratory failure due to bronchiolitis                                              | Not RCT                    |
| Donlan     | 2011 | Pediatric Pulmonology                                  | Use of continuous positive airway pressure (CPAP) in acute viral bronchiolitis: A systematic review                                                             | Not RCT                    |

|                |      |                                                                                                         |                                                                                                                                                                      |                            |
|----------------|------|---------------------------------------------------------------------------------------------------------|----------------------------------------------------------------------------------------------------------------------------------------------------------------------|----------------------------|
| Ebraheem       | 2014 | Critical Care Medicine                                                                                  | High flow nasal cannula in critically ill infants and children with bronchiolitis and pneumonia                                                                      | Not RCT                    |
| Ergol          | 2018 | European journal of pediatrics                                                                          | Using a high-flow nasal cannula provides superior results to OxyMask delivery in moderate to severe bronchiolitis: a randomized controlled study                     | Another kind of comparator |
| Essouri        | 2015 | Archives de Pediatrie                                                                                   | [The role of high-flow oxygen therapy for bronchiolitis]                                                                                                             | Not RCT                    |
| Fernandes      | 2017 | Pediatric Pulmonology                                                                                   | Pilot study of predictors of response and usability of high-flow nasal cannula oxygen for bronchiolitis across different levels of care                              | Not RCT                    |
| Franklin       | 2015 | BMC pediatrics                                                                                          | Early high flow nasal cannula therapy in bronchiolitis, a prospective randomised control trial (protocol): A Paediatric Acute Respiratory Intervention Study (PARIS) | Not RCT                    |
| Franklin       | 2018 | New England journal of medicine                                                                         | A Randomized Trial of High-Flow Oxygen Therapy in Infants with Bronchiolitis                                                                                         | No moderate or severe      |
| Furness        | 2013 | Archives of Disease in Childhood                                                                        | Question 2: Will continuous positive airway pressure reduce the need for ventilation in bronchiolitis?                                                               | Not RCT                    |
| Garcia-Jacques | 2018 | Critical Care Medicine                                                                                  | 1318: DECREASING BRONCHIOLITIS HOSPITAL LENGTH OF STAY USING A HIGH- FLOW NASAL CANNULA WEANING PROTOCOL                                                             | Not RCT                    |
| Guillot        | 2016 | Annals of Intensive Care. Conference: French Intensive Care Society, International Congress Reanimation | High-flow nasal cannula: First-line treatment of noninvasive ventilation for infants with bronchiolitis. Applicability and risk factors for failure                  | Not RCT                    |
| Habra          | 2020 | Pediatric Pulmonology                                                                                   | A comparison between high-flow nasal cannula and noninvasive ventilation in the management of infants and young children with acute bronchiolitis in the PICU        | Not RCT                    |
| Hanlon         | 2014 | Australian nursing & midwifery journal                                                                  | High flow nasal cannula oxygen therapy for infants and young children with bronchiolitis                                                                             | Not RCT                    |
| Hathorn        | 2014 | Thorax                                                                                                  | The hi-FLO study: A prospective open randomised controlled trial of high flow nasal cannula oxygen therapy against standard care in bronchiolitis                    | No moderate or severe      |
| Hilliard       | 2012 | Archives of disease in childhood                                                                        | Pilot study of vapotherm oxygen delivery in moderately severe bronchiolitis                                                                                          | Another kind of comparator |
| Hodge          | 2000 | Paediatric Respiratory Reviews                                                                          | RSV: Management of the acute episode                                                                                                                                 | Not RCT                    |
| Jones          | 2014 | Intensive Care Medicine                                                                                 | The benefits of nCPAP versus intubation for severe bronchiolitis                                                                                                     | Not RCT                    |
| Kepreotes      | 2017 | The Lancet                                                                                              | High-flow warm humidified oxygen versus standard low-flow nasal cannula oxygen for moderate bronchiolitis (HFWHO RCT): an open, phase 4, randomised controlled trial | Another kind of comparator |
| Kepreotes      | 2016 | European Respiratory Journal. Conference: European Respiratory Society Annual Congress                  | A randomized controlled trial examining high-flow oxygen in the management of infants with moderate bronchiolitis                                                    | Another kind of comparator |
| Kepreotes      | 2016 | Respirology (Carlton, vic.)                                                                             | High-flow oxygen compared to standard nasal cannula oxygen does not reduce the median time on oxygen for infants with moderate bronchiolitis                         | Another kind of comparator |
| Kinikar        | 2011 | Indian Journal of Pediatrics                                                                            | Use of indigenous bubble CPAP during swine flu pandemic in Pune, India                                                                                               | No RCT                     |
| Kneyber        | 2013 | Archives of Disease in Childhood                                                                        | Question 1: Is there a role for high-flow nasal cannula oxygen therapy to prevent endotracheal intubation in children with viral bronchiolitis?                      | Not RCT                    |
| Korppi         | 2016 | Acta Paediatrica                                                                                        | Randomised controlled studies are needed to evaluate the use of high-flow nasal cannula therapy in bronchiolitis                                                     | Not RCT                    |
| Lal            | 2017 | Indian Pediatrics                                                                                       | Continuous Positive Airway Pressure in Bronchiolitis: A Randomized Controlled Trial                                                                                  | Another kind of comparator |
| Lieberthal     | 2007 | Pediatrics                                                                                              | Oxygen therapy for bronchiolitis                                                                                                                                     | Not RCT                    |
| Lin            | 2019 | Archives of Disease in Childhood                                                                        | High-flow nasal cannula therapy for children with bronchiolitis: a systematic review and meta-analysis.                                                              | Not RCT                    |
| Mayfield       | 2014 | Journal of Paediatrics and Child Health                                                                 | High-flow nasal cannula oxygen therapy for infants with bronchiolitis: Pilot study                                                                                   | No moderate or severe      |

|                     |      |                                                                                                                                 |                                                                                                                                                                                                                                      |                                   |
|---------------------|------|---------------------------------------------------------------------------------------------------------------------------------|--------------------------------------------------------------------------------------------------------------------------------------------------------------------------------------------------------------------------------------|-----------------------------------|
| Milani              | 2016 | Acta Paediatrica, International Journal of Paediatrics                                                                          | Using a high-flow nasal cannula provided superior results to low-flow oxygen delivery in moderate to severe bronchiolitis                                                                                                            | Not RCT                           |
| Milesi              | 2016 | Annals of Intensive Care. Conference: French Intensive Care Society, International Congress Reanimation                         | Interest of high-flow nasal cannula (HFNC) versus nasal continuous positive airway pressure (nCPAP) during the initial management of severe bronchiolitis in infants: A multicenter randomized controlled trial                      | Included in following publication |
| Milesi              | 2012 | Pediatric Pulmonology                                                                                                           | 6 Cmh2O Continuous Positive Airway Pressure Versus Conventional Oxygen Therapy in Severe Viral Bronchiolitis: A Randomized Trial                                                                                                     | Another kind of comparator        |
| Milesi              | 2010 | American Journal of Respiratory and Critical Care Medicine. Conference: American Thoracic Society International Conference, ATS | Randomized comparison between nasal continuous positive airway pressure (NCPAP) and conventional nasal oxygen delivery on respiratory muscle load and respiratory distress syndrome in young infants with severe acute bronchiolitis | Included in following publication |
| Moral               | 2015 | Anales de Pediatria                                                                                                             | [More non-invasive mechanical ventilation in infants with bronchiolitis, but with the same results]                                                                                                                                  | Not RCT                           |
| Moreel              | 2020 | European Journal of Pediatrics                                                                                                  | High flow nasal cannula as respiratory support in treating infant bronchiolitis: a systematic review                                                                                                                                 | Not Rct                           |
| Nizarali            | 2012 | Revista Brasileira de Terapia Intensiva                                                                                         | Noninvasive ventilation in acute respiratory failure from respiratory syncytial virus bronchiolitis                                                                                                                                  | Not RCT                           |
| Nogalo              | 2017 | Pediatric Pulmonology                                                                                                           | High flow nasal cannula therapy for infants with severe acute bronchiolitis-first experiences                                                                                                                                        | Not RCT                           |
| Ochoa               | 2012 | European Journal of Pediatrics                                                                                                  | Management of acute bronchiolitis in emergency wards in Spain: variability and appropriateness analysis (aBREVIADo Project)                                                                                                          | Not RCT                           |
| Pedersen            | 2017 | Children                                                                                                                        | Comparison of CPAP and HFNC in Management of Bronchiolitis in Infants and Young Children                                                                                                                                             | Not RCT                           |
| Ribera Cano         | 2009 | Archives de Pediatrie                                                                                                           | Non invasive intrapulmonary percussive ventilation (IPV) in viral bronchiolitis. [French]                                                                                                                                            | Not RCT                           |
| Romero              | 2014 | European Respiratory Journal. Conference: European Respiratory Society Annual Congress                                          | High-flow nasal oxygen cannula: A useful non-invasive therapy for mild-severe bronchiolitis in a secondary hospital                                                                                                                  | Not RCT                           |
| Shum                | 2015 | Critical Care Medicine                                                                                                          | Biphasic cuirass ventilation use in bronchiolitis; A prospective study                                                                                                                                                               | Not RCT                           |
| Sochet              | 2016 | Critical Care Medicine                                                                                                          | Wait, wait, don't tube me! early versus delayed mechanical ventilation in severe bronchiolitis                                                                                                                                       | Not RCT                           |
| Soong               | 1993 | Pediatric pulmonology                                                                                                           | Continuous positive airway pressure by nasal prongs in bronchiolitis                                                                                                                                                                 | No relevant outcome               |
| Tasker              | 2008 | Intensive Care Medicine                                                                                                         | CPAP and HFOV: Different guises of the same underlying intensive care strategy for supporting RSV bronchiolitis                                                                                                                      | Not RCT                           |
| Thia                | 2005 | European respiratory journal                                                                                                    | Randomised controlled trial of nasal continuous positive airways pressure (CPAP) in severe bronchiolitis [Abstract]                                                                                                                  | No disponible                     |
| Thia                | 2008 | Archives of Disease in Childhood                                                                                                | Randomised controlled trial of nasal continuous positive airways pressure (CPAP) in bronchiolitis                                                                                                                                    | Another kind of comparator        |
| Thorburn            | 2012 | Pediatric Critical Care Medicine                                                                                                | Heated, humidified high-flow nasal cannula therapy in viral bronchiolitis--Panacea, passing phase, or progress?                                                                                                                      | Not RCT                           |
| Toledo Del Castillo | 2015 | Anales de Pediatria                                                                                                             | [Non-invasive ventilation has changed clinical practice in bronchiolitis carta de editor                                                                                                                                             | Not RCT                           |
| Toledo del Castillo | 2015 | Anales de Pediatria                                                                                                             | [Evolution of non-invasive ventilation in acute bronchiolitis]                                                                                                                                                                       | Not RCT                           |
| Vahlkvist           | 2019 | European Journal of Pediatrics                                                                                                  | High flow nasal cannula and continuous positive airway pressure therapy in treatment of viral bronchiolitis: a randomized clinical trial                                                                                             | Includ Mild bronchiolitis         |
| Yanez               | 2008 | Pediatric Critical Care Medicine                                                                                                | A prospective, randomized, controlled trial of noninvasive ventilation in pediatric acute respiratory failure                                                                                                                        | Another kind of comparator        |
| Yehya               | 2013 | Pediatric Critical Care Medicine                                                                                                | The nose knows what it wants: High-flow nasal Cannula versus nasopharyngeal continuous positive airway pressure                                                                                                                      | Not RCT                           |
